# Supplementary material for: Delilah, prospero, and D-Pax2 constitute a gene regulatory network essential for the development of functional proprioceptors
Source: eLife. 2021 Dec 29;10:e70833. doi: 10.7554/eLife.70833 (PMC8716109; doi:10.7554/eLife.70833)
Supplement: Supplementary file 2. — This table lists all the dei-related transgenes used in this study, including the vectors used and landing sites. The sequences of the wildtype and mutated deiChO-262 fragments are shown. The associated Figures are indicated. [file elife-70833-supp2.xlsx]

## Sheet: Table S2
Supplementary File 2
List of Transgenes and Sequences of the DNA fragments Used in this Study along with Associated Figures are shown.
Construct name	Vector	Insertion site	Origin	Figure	Insert sequence
deiattachment-lacZ	pH-Pelican	1st 2nd and 3rd chromosome	Nachman et al., 2015	1
deiChO-1353-lacZ	pH-Pelican	1st 2nd and 3rd chromosome	Nachman et al., 2015	1
deiChO-1353 -GFP	pGreen-H-pelican		Halachmi et al., 2016	3
deiChO-389 -lacZ	pH-Pelican		Nachman et al., 2015	1
deiChO-Gal4	pChs-gal4	1st 2nd and 3rd chromosome	This study
deiChO-262- lacZ	pH-Pelican		This study	1,3	AAGCTTCAACGCAATGAGCAATGAGAAATTTCATTTGGCAGACCAATTTGTTCTTGCCCCCGCTGCTAAATTGTATTTATTAGTTTTTTGGTTTGATGCGTTTCGTTTCGTTTCGTCTCGGTTTTTCGGCTTCAGTGGGTTTTATGACGGAAGCACTACTCAAGAATCGACTTCAGTTCATTGAAGCCAATTCGAGAGCCGTTTACGGAAGTTTTTGGCGGGGTGGGTCCGAAAATAACCGATTCGCTTCATTGCACAAGCCCCATATTCTAGA
deiChO-262 wildtype	placZattB	attP2 (68A4)	This study	5	AAGCTTCAACGCAATGAGCAATGAGAAATTTCATTTGGCAGACCAATTTGTTCTTGCCCCCGCTGCTAAATTGTATTTATTAGTTTTTTGGTTTGATGCGTTTCGTTTCGTTTCGTCTCGGTTTTTCGGCTTCAGTGGGTTTTATGACGGAAGCACTACTCAAGAATCGACTTCAGTTCATTGAAGCCAATTCGAGAGCCGTTTACGGAAGTTTTTGGCGGGGTGGGTCCGAAAATAACCGATTCGCTTCATTGCACAAGCCCCATATTCTAGA
deiChO-262 Pros-site 1	placZattB	attP2 (68A4)	This study	5	AAGCTTCAACGCAATGAGCAATGAGAAATTTCATTTGGCAGACCAATTTGTTCTTGCCCCCGCTGCTAAATTGTATTTATTAGTTTTTTGGTTTGATGCGTTTCGTTTCGTTTCGTCTATTTTTTTCGGCTTCAGTGGGTTTTATGACGGAAGCACTACTCAAGAATCGACTTCAGTTCATTGAAGCCAATTCGAGAGCCGTTTACGGAAGTTTTTGGCGGGGTGGGTCCGAAAATAACCGATTCGCTTCATTGCACAAGCCCCATATTCTAGA
deiChO-262 Pros-site 2	placZattB	attP2 (68A4)	This study	5	AAGCTTCAACGCAATGAGCAATGAGAAATTTCATTTGGCAGACCAATTTGTTCTTGCCCCCGCTGCTAAATTGTATTTATTAGTTTTTTGGTTTGATGCGTTTCGTTTCGTTTCGTCTCGGTTTTTCGGCTTCAGTGGGTTTTATGACGGAAGCACTACTCACTCATCGACTTCAGTTCATTGAAGCCAATTCGAGAGCCGTTTACGGAAGTTTTTGGCGGGGTGGGTCCGAAAATAACCGATTCGCTTCATTGCACAAGCCCCATATTCTAGA
deiChO-262 Pros-site 3	placZattB	attP2 (68A4)	This study	5	AAGCTTCAACGCAATGAGCAATGAGAAATTTCATTTGGCAGACCAATTTGTTCTTGCCCCCGCTGCTAAATTGTATTTATTAGTTTTTTGGTTTGATGCGTTTCGTTTCGTTTCGTCTCGGTTTTTCGGCTTCAGTGGGTTTTATGACGGAAGCACTACTCAAGAATCGACTTCAGTTCATTGAAGCCAATTCGAGAGCCGTTTAATTAAGTTTTTGGCGGGGTGGGTCCGAAAATAACCGATTCGCTTCATTGCACAAGCCCCATATTCTAGA
deiChO-262 Pros-site 1+2+3	placZattB	attP2 (68A4)	This study	5	AAGCTTCAACGCAATGAGCAATGAGAAATTTCATTTGGCAGACCAATTTGTTCTTGCCCCCGCTGCTAAATTGTATTTATTAGTTTTTTGGTTTGATGCGTTTCGTTTCGTTTCGTCTATTTTTTTCGGCTTCAGTGGGTTTTATGACGGAAGCACTACTCACTCATCGACTTCAGTTCATTGAAGCCAATTCGAGAGCCGTTTAATTAAGTTTTTGGCGGGGTGGGTCCGAAAATAACCGATTCGCTTCATTGCACAAGCCCCATATTCTAGA
deiChO-262 Pax2-site 1	placZattB	attP2 (68A4)	This study	5	AAGCTTCAACGCAATGAGCAATGAGAAATTTCATTTGGCAGACCAATTTGTTCTTGCCCCCGCTGCTAAATTGTATTTATTAGTTTTTTGGTTTGATGCGTTTCGTTTCGTTTCGTCTCGGTTTTTCTTATTCAGTGGGTTTTATGACGGAAGCACTACTCAAGAATCGACTTCAGTTCATTGAAGCCAATTCGAGAGCCGTTTACGGAAGTTTTTGGCGGGGTGGGTCCGAAAATAACCGATTCGCTTCATTGCACAAGCCCCATATTCTAGA
deiChO-262 Pax2-site 2	placZattB	attP2 (68A4)	This study	5	AAGCTTCAACGCAATGAGCAATGAGAAATTTCATTTGGCAGACCAATTTGTTCTTGCCCCCGCTGCTAAATTGTATTTATTAGTTTTTTGGTTTGATGCGTTTCGTTTCGTTTCGTCTCGGTTTTTCGGCTTCAGTGGGTTTTATGACGGAAGCACTACTCAAGAATCGACTTCAGTTCATTGAAGCCAATTCGAGAGCCGTTTACGGAAGTTTTTGGCGGGGTGGGTCCGAAAATAACCGATTCGCGGAATTGCACAAGCCCCATATTCTAGA
deiChO-262 Pax2-site 1+2	placZattB	attP2 (68A4)	This study	5	AAGCTTCAACGCAATGAGCAATGAGAAATTTCATTTGGCAGACCAATTTGTTCTTGCCCCCGCTGCTAAATTGTATTTATTAGTTTTTTGGTTTGATGCGTTTCGTTTCGTTTCGTCTCGGTTTTTCTTATTCAGTGGGTTTTATGACGGAAGCACTACTCAAGAATCGACTTCAGTTCATTGAAGCCAATTCGAGAGCCGTTTACGGAAGTTTTTGGCGGGGTGGGTCCGAAAATAACCGATTCGCGGAATTGCACAAGCCCCATATTCTAGA
