# Supplementary material for: Delilah, prospero, and D-Pax2 constitute a gene regulatory network essential for the development of functional proprioceptors
Source: eLife. 2021 Dec 29;10:e70833. doi: 10.7554/eLife.70833 (PMC8716109; doi:10.7554/eLife.70833)
Supplement: Supplementary file 3. — The Oligos and Protein Concentrations Used in the described Electro Mobility Shift Assays performed in this study. The mutated nucleotides in the competitor oligos are underlined. [file elife-70833-supp3.xlsx]

## Sheet: Sheet1
Supplementary File 3
The Oligos and Protein Concentrations Used for Electro Mobility Shift Assays along with Associated Figures are shown
The mutated nucleotides in the copmetitor oligos are underlined.
Oligo name	Type	Figure	Sequence	Pax2 Concentration	Pros concentration
Dei1	Fluorescent probe	Fig 5-figure supplement 1, 2	CAACGCAATGAGCAATGAGAAATTTCATTTGGCAGACCAATTTGTTCTTG	100nM, 250nM, 500nM	50nM, 100nM, 250nM, 500nM
Dei2	Fluorescent probe	Fig 5-figure supplement 1, 2	AATTTGTTCTTGCCCCCGCTGCTAAATTGTATTTATTAGTTTTTTGGTTT	100nM, 250nM, 500nM	50nM, 100nM, 250nM, 500nM
Dei3	Fluorescent probe	Fig 5 and Fig 5-figure supplement 1, 2	TTTTTGGTTTGATGCGTTTCGTTTCGTTTCGTCTCGGTTTTTCGGCTTCA	100nM, 250nM, 500nM	50nM, 100nM, 250nM, 500nM
Dei4	Fluorescent probe	Fig 5 and Fig 5-figure supplement 1, 2	TTTTCGGCTTCAGTGGGTTTTATGACGGAAGCACTACTCAAGAATCG	100nM, 250nM, 500nM	50nM, 100nM, 250nM, 500nM
Dei5	Fluorescent probe	Fig 5 and Fig 5-figure supplement 1, 2	ACTCAAGAATCGACTTCAGTTCATTGAAGCCAATTCGAGAGCCGT	100nM, 250nM, 500nM	50nM, 100nM, 250nM, 500nM
Dei6	Fluorescent probe	Fig 5 and Fig 5-figure supplement 1, 2	TTCGAGAGCCGTTTACGGAAGTTTTTGGCGGGGTGGGTCCGAAAA	100nM, 250nM, 500nM	50nM, 100nM, 250nM, 500nM
Dei7	Fluorescent probe	Fig 5 and Fig 5-figure supplement 1, 2	TGGGTCCGAAAATAACCGATTCGCTTCATTGCACAAGCCCCATAT	100nM, 250nM, 500nM	50nM, 100nM, 250nM, 500nM
Dei3a	Competitor	Fig 5-figure supplement 1, 2	TTTTTGGTTTGATGCGTTTCGTTTCG	300nM	100nM
Dei3b	Competitor	Fig 5-figure supplement 1, 2	TTCGTTTCGTCTCGGTTTTTCGGCTTCA	300nM	100nM
Dei4a	Competitor	Fig 5-figure supplement 2	TTTTCGGCTTCAGTGGGTTTTATGACGG		100nM
Dei4b	Competitor	Fig 5-figure supplement 2	TGACGGAAGCACTACTCAAGAATCG		100nM
Dei5a	Competitor	Fig 5-figure supplement 2	ACTCAAGAATCGACTTCAGTTCATTG		100nM
Dei5b	Competitor	Fig 5-figure supplement 2	TCATTGAAGCCAATTCGAGAGCCGT		100nM
Dei6a	Competitor	Fig 5-figure supplement 2	TTCGAGAGCCGTTTACGGAAGTTTT		100nM
Dei6b	Competitor	Fig 5-figure supplement 2	GTTTTTGGCGGGGTGGGTCCGAAAA		100nM
Dei7a	Competitor	Fig 5-figure supplement 1	TGGGTCCGAAAATAACCGATTCGCT	50nM
Dei7b	Competitor	Fig 5-figure supplement 1	TAACCGATTCGCTTCATTGCACA	50nM
Dei7c	Competitor	Fig 5-figure supplement 1	TCGCTTCATTGCACAAGCCCCATAT	50nM
Dei7d	Competitor	Fig 5-figure supplement 1	TAACCGATTCGCTTCATTGCACAAGCCC	50nM
Dei3b-mutA	Competitor	Fig 5-figure supplement 1, 2	GGAGTTTCGTCTCGGTTTTTCGGCTTCA	300nM	100nM
Dei3b-mutB	Competitor	Fig 5-figure supplement 1, 2	TTCTGGTCGTCTCGGTTTTTCGGCTTCA	300nM	100nM
Dei3b-mutC	Competitor	Fig 5-figure supplement 1, 2	TTCGTTGATTCTCGGTTTTTCGGCTTCA	300nM	100nM
Dei3b-mutD	Competitor	Fig 5-figure supplement 1, 2	TTCGTTTCGGAGCGGTTTTTCGGCTTCA	300nM	100nM
Dei3b-mutE	Competitor	Fig 5-figure supplement 1, 2	TTCGTTTCGTCTATTTTTTTCGGCTTCA	300nM	100nM
Dei3b-mutF	Competitor	Fig 5-figure supplement 1, 2	TTCGTTTCGTCTCGGGGGTTCGGCTTCA	300nM	100nM
Dei3b-mutG	Competitor	Fig 5-figure supplement 1, 2	TTCGTTTCGTCTCGGTTTGGAGGCTTCA	300nM	100nM
Dei3b-mutH	Competitor	Fig 5-figure supplement 1, 2	TTCGTTTCGTCTCGGTTTTTCTTATTCA	300nM	100nM
Dei3b-mutI	Competitor	Fig 5-figure supplement 1, 2	TTCGTTTCGTCTCGGTTTTTCGGCGGAA	300nM	100nM
Dei4b-mutA	Competitor	Fig 5-figure supplement 2	GTCCGGAAGCACTACTCAAGAATCG		100nM
Dei4b-mutB	Competitor	Fig 5-figure supplement 2	TGAATTAAGCACTACTCAAGAATCG		100nM
Dei4b-mutC	Competitor	Fig 5-figure supplement 2	TGACGGCCTCACTACTCAAGAATCG		100nM
Dei4b-mutD	Competitor	Fig 5-figure supplement 2	TGACGGAAGACATACTCAAGAATCG		100nM
Dei4b-mutE	Competitor	Fig 5-figure supplement 2	TGACGGAAGCACGCATCAAGAATCG		100nM
Dei4b-mutF	Competitor	Fig 5-figure supplement 2	TGACGGAAGCACTACGACAGAATCG		100nM
Dei4b-mutG	Competitor	Fig 5-figure supplement 2	TGACGGAAGCACTACTCACTCATCG		100nM
Dei4b-mutH	Competitor	Fig 5-figure supplement 2	TGACGGAAGCACTACTCAAGACGAG		100nM
Dei5a-mutA	Competitor	Fig 5-figure supplement 2	CAGCAAGAATCGACTTCAGTTCATTG		100nM
Dei5a-mutB	Competitor	Fig 5-figure supplement 2	ACTACCGAATCGACTTCAGTTCATTG		100nM
Dei5a-mutC	Competitor	Fig 5-figure supplement 2	ACTCAATCCTCGACTTCAGTTCATTG		100nM
Dei5a-mutD	Competitor	Fig 5-figure supplement 2	ACTCAAGAAGATACTTCAGTTCATTG		100nM
Dei5a-mutE	Competitor	Fig 5-figure supplement 2	ACTCAAGAATCGCAGTCAGTTCATTG		100nM
Dei5a-mutF	Competitor	Fig 5-figure supplement 2	ACTCAAGAATCGACTGACGTTCATTG		100nM
Dei5a-mutG	Competitor	Fig 5-figure supplement 2	ACTCAAGAATCGACTTCATGGCATTG		100nM
Dei5a-mutH	Competitor	Fig 5-figure supplement 2	ACTCAAGAATCGACTTCAGTTACGTG		100nM
Dei6a-mutA	Competitor	Fig 5-figure supplement 2	TTCGAGAGCATGTTACGGAAGTTTT		100nM
Dei6a-mutB	Competitor	Fig 5-figure supplement 2	TTCGAGAGCCGTGGCCGGAAGTTTT		100nM
Dei6a-mutC	Competitor	Fig 5-figure supplement 2	TTCGAGAGCCGTTTAATTAAGTTTT		100nM
Dei6a-mutD	Competitor	Fig 5-figure supplement 2	TTCGAGAGCCGTTTACGGCCTTTTT		100nM
Dei6a-mutE	Competitor	Fig 5-figure supplement 2	TTCGAGAGCCGTTTACGGAAGGGGT		100nM
Dei7d-mutA	Competitor	Fig 5-figure supplement 1	GCCCCGATTCGCTTCATTGCACAAGCCC	50nM
Dei7d-mutB	Competitor	Fig 5-figure supplement 1	TAAAATATTCGCTTCATTGCACAAGCCC	50nM
Dei7d-mutC	Competitor	Fig 5-figure supplement 1	TAACCGCGGCGCTTCATTGCACAAGCCC	50nM
Dei7d-mutD	Competitor	Fig 5-figure supplement 1	TAACCGATTATATTCATTGCACAAGCCC	50nM
Dei7d-mutE	Competitor	Fig 5-figure supplement 1	TAACCGATTCGCGGAATTGCACAAGCCC	50nM
Dei7d-mutF	Competitor	Fig 5-figure supplement 1	TAACCGATTCGCTTCCGGGCACAAGCCC	50nM
Dei7d-mutG	Competitor	Fig 5-figure supplement 1	TAACCGATTCGCTTCATTTACCAAGCCC	50nM
Dei7d-mutH	Competitor	Fig 5-figure supplement 1	TAACCGATTCGCTTCATTGCAACCGCCC	50nM
Dei7d-mutAI	Competitor	Fig 5-figure supplement 1	TAACCGATTCGCTTCATTGCACAATAAC	50nM
